# Supplementary material
Source: PubMed Central journal article supplement (PMC4410871)

Fig. S1

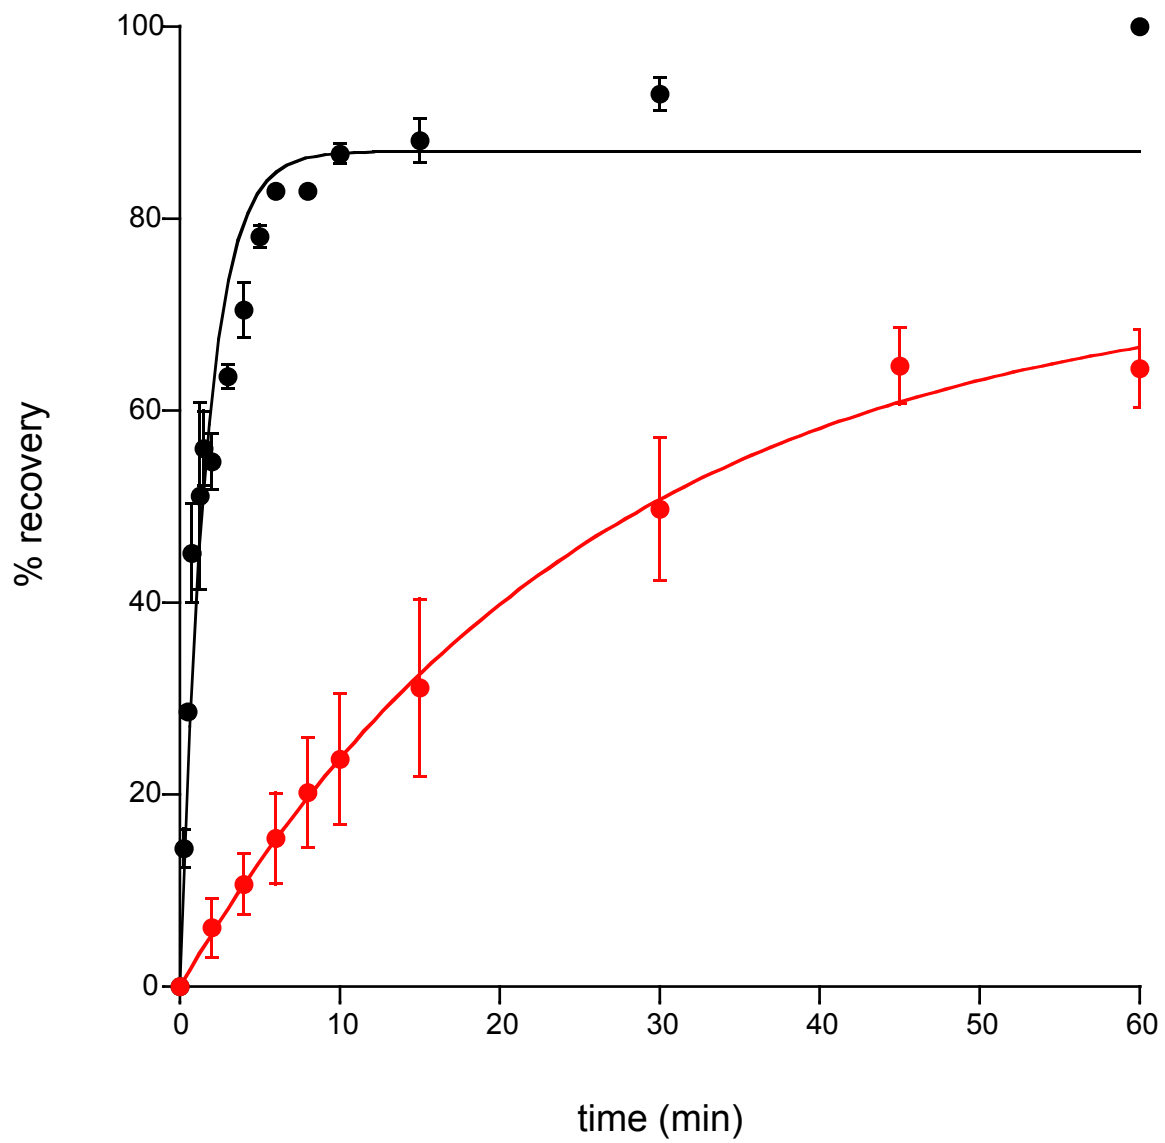

Supplement: NIHMS656749-supplement-1.pdf [file NIHMS656749-supplement-1.pdf]
